# Supplementary material for: Electric field effect on the ground state proton transfer in the H-bonded HBDI complex: an implication of the green fluorescent protein
Source: Royal Society of Chemistry journal article supplement (doi:10.1039/c4ra00974f), 2014-01-01
Supplement: c4ra00974f1.pdf [file c4ra00974f1.pdf]

## Electronic Supplementary Information

# Electric Field Effect on the Ground State Proton Transfer in the H-bonded HBDI Complex: An Implication of Green Fluorescent Protein

Baotao Kang,<sup>a</sup> Hongguang Liu,<sup>a</sup> Du-Jeon Jang,<sup>b</sup> Jin Yong Lee<sup>a\*</sup>

<sup>a</sup> *Department of Chemistry, Sungkyunkwan University, Suwon, 440746, Korea*

<sup>b</sup> *Department of Chemistry, Seoul National University, Seoul 151-742, Korea.*

### Contents

**Figure S1.** Optimized structures of NC and IC under different electric field.

**Figure S2.** HOMOs and LUMOs of NC and IC under some electric fields.

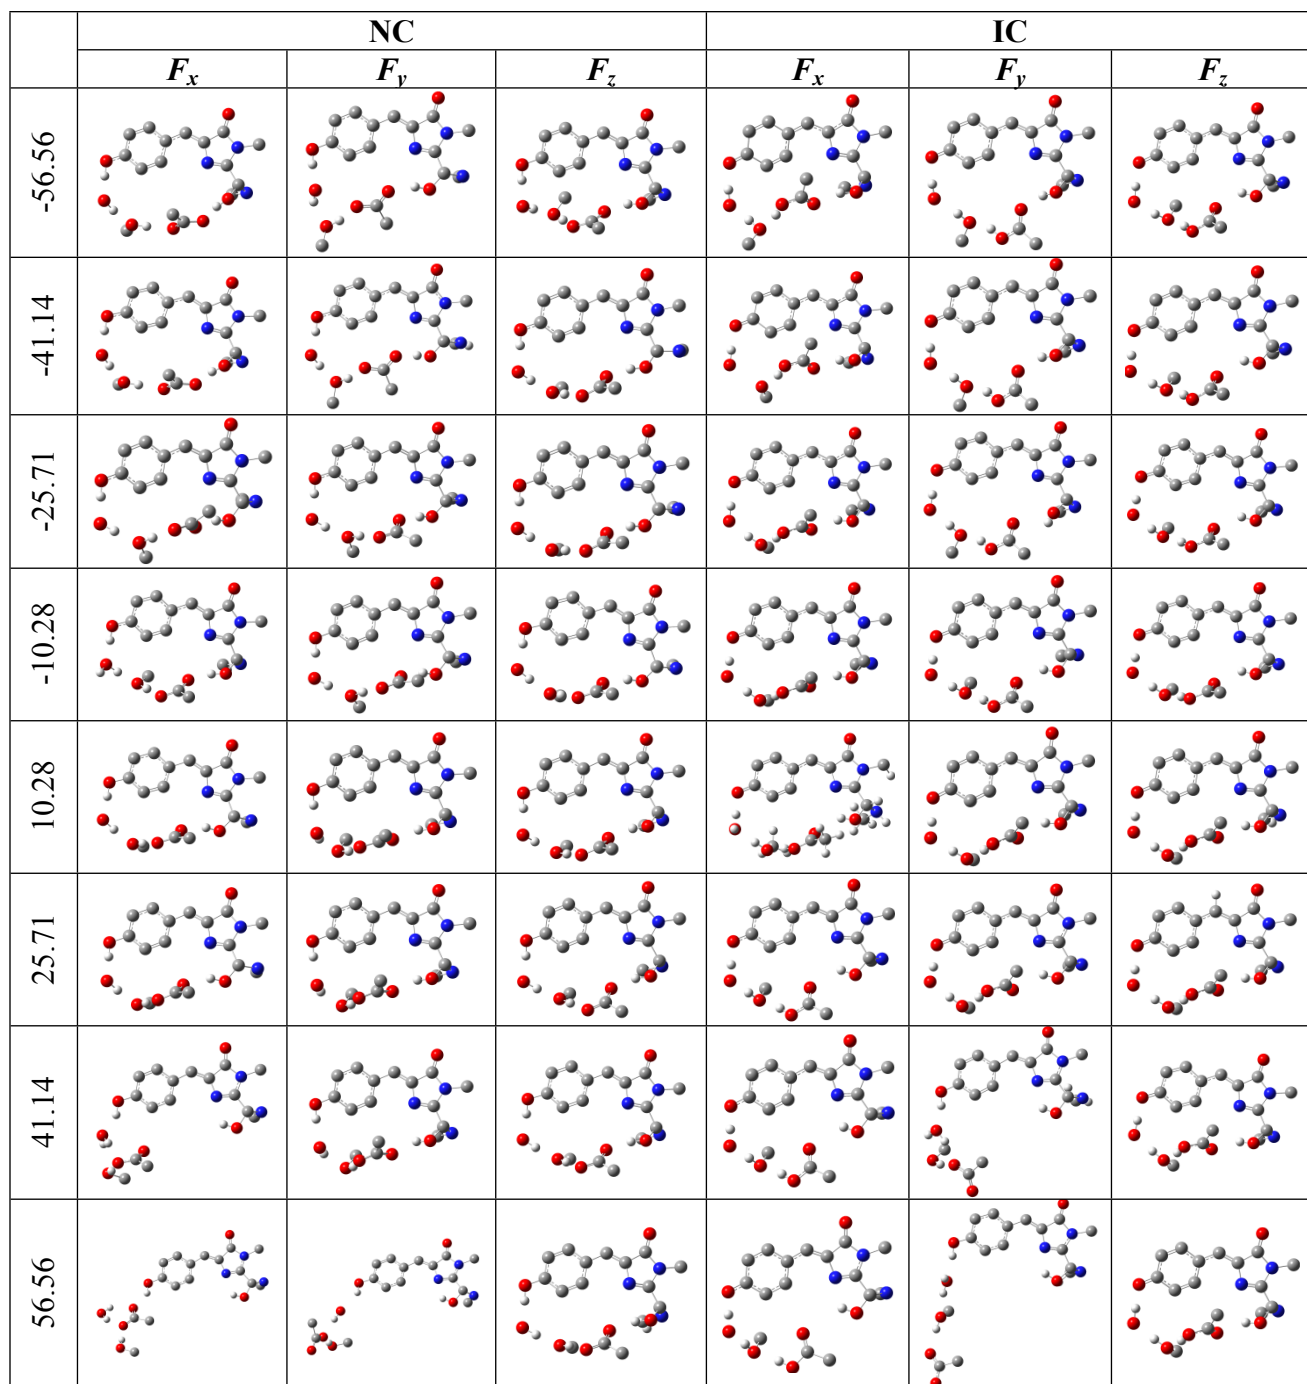

**Figure S1.** Optimized structures of NC and IC under different electric field.

|        |      | NC                    |       |       | IC                    |       |       |
|--------|------|-----------------------|-------|-------|-----------------------|-------|-------|
|        |      | $F_x$                 | $F_y$ | $F_z$ | $F_x$                 | $F_y$ | $F_z$ |
| -56.56 | LUMO |                       |       |       |                       |       |       |
|        | HOMO |                       |       |       |                       |       |       |
| -25.71 | LUMO |                       |       |       |                       |       |       |
|        | HOMO |                       |       |       |                       |       |       |
| 25.71  | LUMO |                       |       |       |                       |       |       |
|        | HOMO |                       |       |       |                       |       |       |
| 56.56  | LUMO | <br>No electric field |       |       | <br>No electric field |       |       |
|        | HOMO | <br>No electric field |       |       | <br>No electric field |       |       |

**Figure S2.** HOMOs and LUMOs of NC and IC under some electric fields.
